# Supplementary material for: Multiple mutations in polyketide synthase led to disruption of Psittacofulvin production across diverse parrot species
Source: PubMed Central journal article supplement — Commun Biol. 2025 Jan 17;8:69. doi: 10.1038/s42003-025-07537-7 (PMC11739604; doi:10.1038/s42003-025-07537-7), 2025-01-17
Supplement: 42003_2025_7537_MOESM2_ESM.pdf [file 42003_2025_7537_MOESM2_ESM.pdf]

Supplementary Materials for

**Multiple mutations in polyketide synthase led to disruption of Psittacofulvin production  
across diverse parrot species**

Shatadru Ghosh Roy *et al.*

\*Corresponding author. Email: abdu@bgu.ac.il

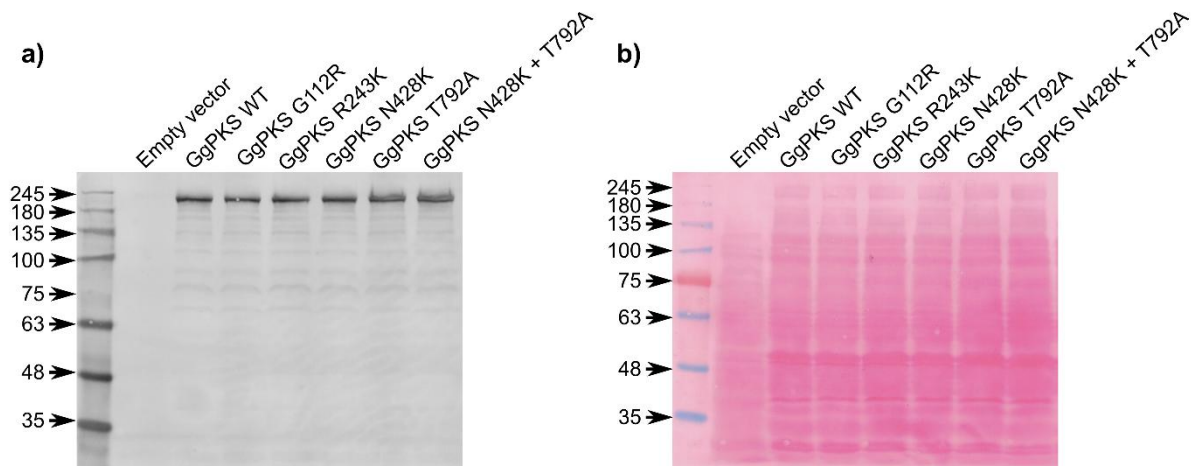

**Fig. S1. Confirmation of HA-tagged GgPKS expression in BJ5464-NpgA yeast strain.** (A) western blot against HA-tagged GgPKS expressed in yeast (expanded view of bottom row of Figure 3d). The input materials were total soluble protein extracts from the GgPKS-expressing yeast strains. (B) The Ponceau S-stained membrane is shown as a loading control.

| <b>Common name</b> | <b>Scientific name</b>       | <b>Family</b> | <b>Male</b>                                                                                                                    | <b>Female</b>                                                                                           |
|--------------------|------------------------------|---------------|--------------------------------------------------------------------------------------------------------------------------------|---------------------------------------------------------------------------------------------------------|
| Rose-ringed        | <i>Psittacula krameri</i>    | Psittaculidae | predominantly green body with a pink and black neck ring                                                                       | predominantly green body with no neck rings, or shadow-like pale to dark grey neck rings                |
| Alexandrine        | <i>Psittacula eupatria</i>   | Psittaculidae | predominantly green body with red patch on the shoulders; black stripe across their lower cheeks and a pink band on their nape | Same green appearance as males with red patch on the shoulders; no black cheek stripe or pink nape band |
| Eclectus           | <i>Eclectus roratus</i>      | Psittaculidae | mostly bright green: tail feathers are green centrally and bluer as they get towards the edges.                                | mostly bright red with a darker purple hue on the back and wings                                        |
| Galah              | <i>Eolophus roseicapilla</i> | Cacatuidae    | No sexual dimorphism; pale silver to grey back, pale grey rump, pink face and breast, and light pink crest                     |                                                                                                         |

**Table S1: Species details included in this study with key features of their plumage coloration.**

| Sl no. | Exon# | Fw                    | Rv                    |
|--------|-------|-----------------------|-----------------------|
| 1.     | 1     | GGGAAGCTCACCTTTTAAC   | CTACAGAAGGGAGGAACGTG  |
| 2.     | 2     | GTGGGAGTTCCTCCTAAC    | GCTCTCCTTGTGCCTTGCAC  |
| 3.     | 3     | CAGTTACTGCTTTGCTTTAG  | CCTTAGATCTCCAGTGCTAG  |
| 4.     | 4     | GCACTATTGATGCCATGTCTG | CCTGGAGTAAAATAGAAAC   |
| 5.     | 5     | CGGGATTGAAGAGGTGTTAG  | GCAACCACTCTTATGTTAC   |
| 6.     | 6a    | CCCCTACTATGGGAAATG    | GCATCATCAGAAGCACTTTG  |
| 7.     | 6b    | GGAATATTGGGCACACTG    | GGAAGGGTTATGGAATTCC   |
| 8.     | 6c    | GCCTCTGGAATTAGTTCTGC  | CTTTCACCTCTTGCTGGCAG  |
| 9.     | 6d    | CGCTGAAGGAGTTCAGTGAG  | CCTCAACAGGGATGTTTCC   |
| 10.    | 6e    | CCCTGGCAGATGCAGTC     | CATCATCAGAAGCAGCCAC   |
| 11.    | 6f    | GCATGGATATTATACTTG    | GCCAGTTGGGATTATATCC   |
| 12.    | 6g    | GTTCTCTTCTTTGCAAATG   | CTTGATGCTCAAGACTTGGG  |
| 13.    | 6h    | GTGGCTTTAGTCCCTGGTGC  | CTTGTTTACCTTTATGCTTG  |
| 14.    | 6i    | GTATGGCTCCATATTCAAGC  | CTGTGAAAGAGTTATTTT    |
| 15.    | 6j    | GCCATCACTTTCATGAAG    | CTTTCAGTTGTTCTGTAG    |
| 16.    | 6k    | CTATCGCCAAGTTGTTGTG   | GTTGAGTAGCAGTGCTGGTGG |
| 17.    | 6l    | CAGAAATGTTTACTTTGTAC  | CCTGGAATCTGAACTCTGG   |
| 18.    | 6m    | GCAACGGGCGTTGATGTAAAG | GTCGATTGCCACACACTATC  |
| 19.    | 6n    | CCACTGCTGATAAGTTCCG   | CAGCTTCTGGGATTCATACAG |
| 20.    | 6o    | CCTGCAAATCTGTCCCAC    | GCCCAATGAAGATTTAGGG   |
| 21.    | 6p    | GCAGGGAGTCCAATCAAAG   | GTAAGCTCTTCCTGAGATAC  |
| 22.    | 6q    | CAAAACCATCTTCAGTCCC   | CATGGTTCTGAATTGCCATAG |
| 23.    | 6r    | CTAACCATGAATACAGCAC   | GAAGAGTACACTCAGCATC   |

**Table S2. Intronic primers used for genotyping PKS coding sequence of *P. Kramerii*, *P. eupatria*, *E. roratus*. Exon 6 has been split into 18 (6a-6r) overlapping amplicons of 500bp approximately.**

|     | Exon# | Fw                      | Rv                     |
|-----|-------|-------------------------|------------------------|
| 1.  | 1     | GGGAAGCTCACCTTTTAAC     | CTACAGAAGTAAGGGAGGAATG |
| 2.  | 2     | GTGGGAGTTCCTCGTAACT     | CAGTTCTCCCTGTGCCTTGCAC |
| 3.  | 3     | CAGTTACTGCTTTGCTTTTC    | CCTTAGATCTCCAGTGCTAG   |
| 4.  | 4     | GCACTACTGATGCCATGTAG    | CCTGGAGTGAAATAGAAAC    |
| 5.  | 5     | GGGACTGAAGAGATGCTAGAC   | GCAACCACTCTTATGTTAC    |
| 6.  | 6a    | CCCCTACTATGGGAAATG      | GCATCATCAGAAGCACTTTG   |
| 7.  | 6b    | GGAAATATTGGGCACACTG     | GGGAGGGTTATGGAATTCC    |
| 8.  | 6c    | GCCTCTTGAATTAGTTCTGC    | CTTTCACCTCTTGTGCTGGCAG |
| 9.  | 6d    | CACTGAAGGAGTTCAGTGAGG   | CTCTTCAACAGGGATGTTTCC  |
| 10. | 6e    | CCCTGGCAGATGCAGTC       | CATTTTCAGAAGCAGCCAC    |
| 11. | 6f    | GCATGGATATGATACTTGG     | GCCAGTTGGGATTATATCC    |
| 12. | 6g    | GTTCTCGTCTTTGCAAAATG    | CTTGATGCTCAAGACTTGGG   |
| 13. | 6h    | GTGGCTTTAGTCCCTGGTGC    | CCTTGTTACCTTTATGCTTG   |
| 14. | 6i    | GTATGGCTCCGTATTCAAGC    | CTGTGAAAGAGATATTTTC    |
| 15. | 6j    | GTTACCATCACTTTCATGAAG   | CTTTCAGTTGTTCTGTAG     |
| 16. | 6k    | CTATCGCCAAGTTGTTGTAGCG  | GCTGAGTAGCAGTGCTGGTGG  |
| 17. | 6l    | CAGAAACATTTACTTTGTA     | GATCTCCCATGCAATGATAAAG |
| 18. | 6m    | CAGAATTCAGATTCCAGGAAC   | GTCGACTGCCACACACTATC   |
| 19. | 6n    | CCACTCCTGATAGGTTCCGG    | CAGCTTCTGGGATTTCATACAG |
| 20. | 6o    | CCTGCAAATCTGTCCCAC      | GCCCAATGAAGATTTAGGG    |
| 21. | 6p    | GTGGGGAGTCCAATCAAAG     | GTAAGCTCTTCCTGAGATAC   |
| 22. | 6q    | CAAACCATCTTCAGTCCTTTTGG | CACGGTTCTGAATCGTCATAG  |
| 23. | 6r    | GAACTAACTATGAATACAGCAC  | GAAGAGTACACTCAGCATC    |

**Table S3. Intronic primers used for genotyping PKS coding sequence of *E. roseicapilla*. Exon 6 has been split into 18 (6a-6r) overlapping amplicons of 500bp approximately.**

| <b>Percent Identity</b> | <b>GgPKS</b> | <b>EorPKS</b> | <b>MuPKS</b> | <b>EcrPKS</b> | <b>PkPKS</b> | <b>PePKS</b> |
|-------------------------|--------------|---------------|--------------|---------------|--------------|--------------|
| <b>GgPKS</b>            | 100          | 79.4          | 79.13        | 79.4          | 79.17        | 79.22        |
| <b>EorPKS</b>           |              | 100           | 90.68        | 91.21         | 90.36        | 90.41        |
| <b>MuPKS</b>            |              |               | 100          | 93.87         | 93.39        | 93.44        |
| <b>EcrPKS</b>           |              |               |              | 100           | 97.53        | 97.58        |
| <b>PkPKS</b>            |              |               |              |               | 100          | 99.86        |
| <b>PePKS</b>            |              |               |              |               |              | 100          |

**Table S4. Percent Identity Matrix (created by Clustal2.1) of deduced amino acid sequence of parrot PKS homologs tested in this study along with annotated MuPKS as reference and GgPKS used for functional validation.**

| <b>Species</b>    | <b>Sample #</b> | <b>Phenotype</b> | <b>SNP found as homozygous</b> |
|-------------------|-----------------|------------------|--------------------------------|
| <i>P. krameri</i> | 1               | Green            | None                           |
| <i>P. krameri</i> | 2               | Green            | None                           |
| <i>P. krameri</i> | 3               | Green            | None                           |
| <i>P. krameri</i> | 4               | Green            | None                           |
| <i>P. krameri</i> | 5               | Green            | None                           |
| <i>P. krameri</i> | 6               | Green            | None                           |
| <i>P. krameri</i> | 7               | Green            | None                           |
| <i>P. krameri</i> | 8               | <i>blue</i>      | G334A                          |
| <i>P. krameri</i> | 9               | <i>blue</i>      | G334A                          |
| <i>P. krameri</i> | 10              | <i>blue</i>      | G334A                          |
| <i>P. krameri</i> | 11              | <i>blue</i>      | G2005T                         |
| <i>P. krameri</i> | 12              | <i>blue</i>      | G2005T                         |
| <i>P. krameri</i> | 13              | <i>blue</i>      | G334A                          |
| <i>P. krameri</i> | 14              | <i>blue</i>      | G334A                          |
| <i>P. krameri</i> | 15              | <i>blue</i>      | G2005T                         |
| <i>P. krameri</i> | 16              | <i>blue</i>      | G2005T                         |

**Table S5. Phenotypic and genotypic details of *P. krameri* specimens tested in this study.**

| Species            | Sample # | Phenotype   | SNP found as homozygous |
|--------------------|----------|-------------|-------------------------|
| <i>P. eupatria</i> | 1        | Green       | None                    |
| <i>P. eupatria</i> | 2        | Green       | None                    |
| <i>P. eupatria</i> | 3        | Green       | None                    |
| <i>P. eupatria</i> | 4        | Green       | None                    |
| <i>P. eupatria</i> | 5        | Green       | None                    |
| <i>P. eupatria</i> | 6        | Green       | None                    |
| <i>P. eupatria</i> | 7        | Green       | None                    |
| <i>P. eupatria</i> | 8        | Green       | None                    |
| <i>P. eupatria</i> | 9        | Green       | None                    |
| <i>P. eupatria</i> | 10       | Green       | None                    |
| <i>P. eupatria</i> | 11       | Green       | None                    |
| <i>P. eupatria</i> | 12       | Green       | None                    |
| <i>P. eupatria</i> | 13       | Green       | None                    |
| <i>P. eupatria</i> | 14       | Green       | None                    |
| <i>P. eupatria</i> | 15       | Green       | None                    |
| <i>P. eupatria</i> | 16       | Green       | None                    |
| <i>P. eupatria</i> | 17       | Green       | None                    |
| <i>P. eupatria</i> | 18       | Green       | None                    |
| <i>P. eupatria</i> | 19       | Green       | None                    |
| <i>P. eupatria</i> | 20       | Green       | None                    |
| <i>P. eupatria</i> | 21       | Green       | None                    |
| <i>P. eupatria</i> | 22       | Green       | None                    |
| <i>P. eupatria</i> | 23       | Green       | None                    |
| <i>P. eupatria</i> | 24       | Green       | None                    |
| <i>P. eupatria</i> | 25       | Green       | None                    |
| <i>P. eupatria</i> | 26       | <i>blue</i> | G728A                   |
| <i>P. eupatria</i> | 27       | <i>blue</i> | G728A                   |
| <i>P. eupatria</i> | 28       | <i>blue</i> | A2647T                  |
| <i>P. eupatria</i> | 29       | <i>blue</i> | A2647T                  |
| <i>P. eupatria</i> | 30       | <i>blue</i> | G728A                   |
| <i>P. eupatria</i> | 31       | <i>blue</i> | A2647T                  |
| <i>P. eupatria</i> | 32       | <i>blue</i> | A2647T                  |
| <i>P. eupatria</i> | 33       | <i>blue</i> | G728A                   |
| <i>P. eupatria</i> | 34       | <i>blue</i> | G728A                   |
| <i>P. eupatria</i> | 35       | <i>blue</i> | A2647T                  |
| <i>P. eupatria</i> | 36       | <i>blue</i> | A2647T                  |

**Table S6. Phenotypic and genotypic details of *P. eupatria* specimens tested in this study.**



| Species           | Sex    | Sample # | Phenotype            | SNP found as homozygous |
|-------------------|--------|----------|----------------------|-------------------------|
| <i>E. roratus</i> | Male   | 1        | Green (Male)         | None                    |
| <i>E. roratus</i> | Male   | 2        | Green (Male)         | None                    |
| <i>E. roratus</i> | Female | 3        | Red (Female)         | None                    |
| <i>E. roratus</i> | Male   | 4        | <i>blue</i> (Male)   | C5869T                  |
| <i>E. roratus</i> | Male   | 5        | <i>blue</i> (Male)   | C5869T                  |
| <i>E. roratus</i> | Female | 6        | <i>blue</i> (Female) | C5869T                  |
| <i>E. roratus</i> | Female | 7        | <i>blue</i> (Female) | C5869T                  |
| <i>E. roratus</i> | Male   | 8        | <i>blue</i> (Male)   | C5869T                  |

**Table S7. Phenotypic and genotypic details of *E. roratus* specimens tested in this study.**

| Species                | Sex | Sample # | Phenotype   | SNP found as homozygous |
|------------------------|-----|----------|-------------|-------------------------|
| <i>E. roseicapilla</i> |     | 1        | Pink        | None                    |
| <i>E. roseicapilla</i> |     | 2        | Pink        | None                    |
| <i>E. roseicapilla</i> |     | 3        | Pink        | None                    |
| <i>E. roseicapilla</i> |     | 4        | Pink        | None                    |
| <i>E. roseicapilla</i> |     | 5        | <i>blue</i> | T1284G; A2374G          |
| <i>E. roseicapilla</i> |     | 6        | <i>blue</i> | T1284G; A2374G          |
| <i>E. roseicapilla</i> |     | 7        | <i>blue</i> | T1284G; A2374G          |
| <i>E. roseicapilla</i> |     | 8        | <i>blue</i> | T1284G; A2374G          |
| <i>E. roseicapilla</i> |     | 9        | <i>blue</i> | T1284G; A2374G          |

**Table S8. Phenotypic and genotypic details of *E. roseicapilla* specimens tested in this study.**

| Primer name | Sequence                                                                    |
|-------------|-----------------------------------------------------------------------------|
| G112R_F     | TGCAaGAGTCCCTGTAGAAGC                                                       |
| G112R_R     | AACAAAAACGCCCGTTTTGGTGCCACTGATGGCTTCTACAGGGAC<br>TCtTGCATCCTCCAGTGCTTTGTATG |
| R243K_F     | GGAAaGGGAGAAGGCTGTGGTG                                                      |
| R243K_R     | ATTGCCTTTTCCAGTGGTTTGAGGAATACAACACCACAGCCTTCTC<br>CCtTTCCATAGCCATCTGCC      |
| N428K_F     | CCAAgGCCCATGTTGTAGTC                                                        |
| N428K_R     | AAGGCAGGAAGAGGCTCTGGCTGCTTAACCTGCCTGACTACAACA<br>TGGGCcTTGGTTCCACCAAATCC    |
| T792A_F     | AGAAgCTGCAGCTAGAAACAGG                                                      |
| T792A_R     | GAGGACTTATTTCAACAAACTACATTTCCCTGTTTCTAGCTGC<br>AGcTTCTATGGCTTGAGTGAAAG      |

**Table S9. Primers used for introducing mutations into GgPKS coding sequence.**

**Description of Supplementary data: DATA\_HPLC\_MS.zip, provided in Zenodo**  
(<https://zenodo.org/records/14184888>)

All the data files from UHPLC/HRAM-QTOF analyses are in the Bruker compass native format. The .d file format is native raw data format of the Bruker acquisition software for LC/MS analyses. Hence, to open the files with .d extension we recommend to use Bruker's DataAnalysis software. To download the software a user must first register at [bruker.com](http://bruker.com) (my bruker -> register) [[https://sso.bruker.com/auth/realms/bruker/login-actions/registration?client\\_id=aem-bruker.com&tab\\_id=-rTFVcu1eA0](https://sso.bruker.com/auth/realms/bruker/login-actions/registration?client_id=aem-bruker.com&tab_id=-rTFVcu1eA0)]. After that a section to download mass-spectrometry software unlocks ([bruker.com](http://bruker.com) -> services & support -> software support & upgrades -> mass spectrometry [here a user needs to be signed in] -> software solutions -> DataAnalysis) [<https://www.bruker.com/protected/en/services/software-downloads/mass-spectrometry/software-solutions.html>]. This is the direct link to download the software (user needs to be signed in on [bruker.com](http://bruker.com)) [[https://www.bruker.com/protected/en/services/software-downloads/mass-spectrometry/software-solutions/\\_jcr\\_content/root/sections/section\\_795158518/sectionpar/twocolumns\\_copy/contentpar-2/maintenancewrapper/content/externaldownload\\_cop\\_1204623677.external.zip/BDAL/LSMS/DataAnalysis/6.0/6.0.536.33/dataanalysis-sfx-6.0.536.33-ISO.zip](https://www.bruker.com/protected/en/services/software-downloads/mass-spectrometry/software-solutions/_jcr_content/root/sections/section_795158518/sectionpar/twocolumns_copy/contentpar-2/maintenancewrapper/content/externaldownload_cop_1204623677.external.zip/BDAL/LSMS/DataAnalysis/6.0/6.0.536.33/dataanalysis-sfx-6.0.536.33-ISO.zip)]. Even though the software requires a paid license to offer all the functions, viewing and exporting in various formats is available in unlicensed versions of the DataAnalysis software. Alternatively, the files are possible to be opened using opensource program ProteoWizard (<https://proteowizard.sourceforge.io/>). However, the full compatibility using this software is not guaranteed.

Psittac11\_EP-1\_Ph-APCI\_FA\_Pos\_01\_RA7\_1\_8601.d

PDA and MS data of **psittacofulvins extracted from green feathers** of *Psittacula kramera* using Phenyl-hexyl column and APCI ionization in positive mode.

Psittac11\_EP-2\_Ph-APCI\_FA\_Pos\_01\_RA8\_1\_8602.d

PDA and MS data of **psittacofulvins extracted from yeast expressing empty vector** using Phenyl-hexyl column and APCI ionization in positive mode.

Psittac11\_EP-3\_Ph-APCI\_FA\_Pos\_01\_RB1\_1\_8603.d

PDA and MS data of **psittacofulvins extracted from yeast expressing GgPKS WT** using Phenyl-hexyl column and APCI ionization in positive mode.

Psittac11\_EP-4\_Ph-APCI\_FA\_Pos\_01\_RB2\_1\_8604.d

PDA and MS data of **psittacofulvins extracted from yeast expressing GgPKS G112R** using Phenyl-hexyl column and APCI ionization in positive mode.

Psittac11\_EP-5\_Ph-APCI\_FA\_Pos\_01\_RB3\_1\_8606.d

PDA and MS data of **psittacofulvins extracted from yeast expressing GgPKS R243K** using Phenyl-hexyl column and APCI ionization in positive mode.

Psittac11\_EP-6\_Ph-APCI\_FA\_Pos\_01\_RB4\_1\_8607.d

PDA and MS data of **psittacofulvins extracted from yeast expressing GgPKS N428K** using Phenyl-hexyl column and APCI ionization in positive mode.

Psittac11\_EP-7\_Ph-APCI\_FA\_Pos\_01\_RB5\_1\_8608.d

PDA and MS data of **psittacofulvins extracted from yeast expressing GgPKS T792A** using Phenyl-hexyl column and APCI ionization in positive mode.

Psittac11\_EP-8\_Ph-APCI\_FA\_Pos\_01\_RB6\_1\_8609.d

PDA and MS data of **psittacofulvins extracted from yeast expressing combination of GgPKS N428K and T792A** using Phenyl-hexyl column and APCI ionization in positive mode.

Psittac11\_EP-TB\_Ph-APCI\_FA\_Pos\_01\_RA6\_1\_8600.d

Technical **blank measurement** using Phenyl-hexyl column and APCI ionization in positive mode.
